# Supplementary material for: Depletion of pre-mRNA splicing factor Cdc5L inhibits mitotic progression and triggers mitotic catastrophe
Source: Springer Nature journal article supplement (doi:10.1038/cddis.2014.117), 2014-03-27
Supplement: 41419_2014_BFcddis2014117_MOESM20_ESM.pdf [file 41419_2014_BFcddis2014117_MOESM20_ESM.pdf]

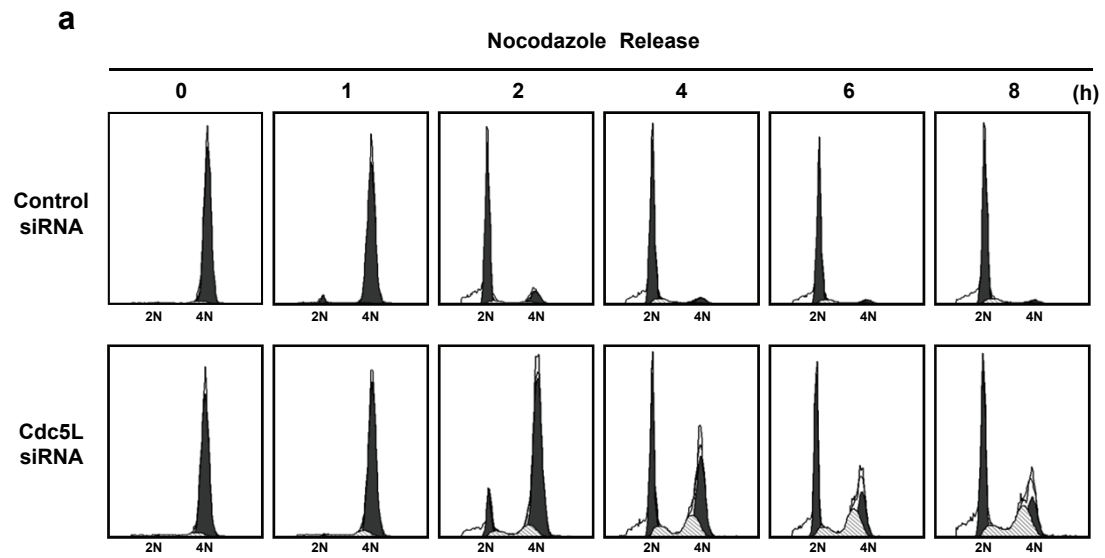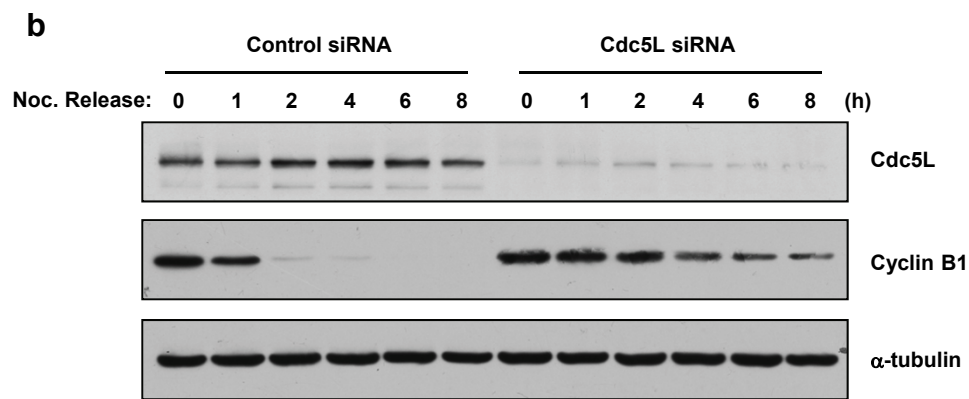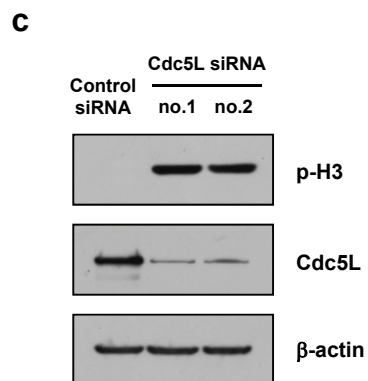

**Supplementary Figure S1** Cdc5L knockdown leads to mitotic arrest.

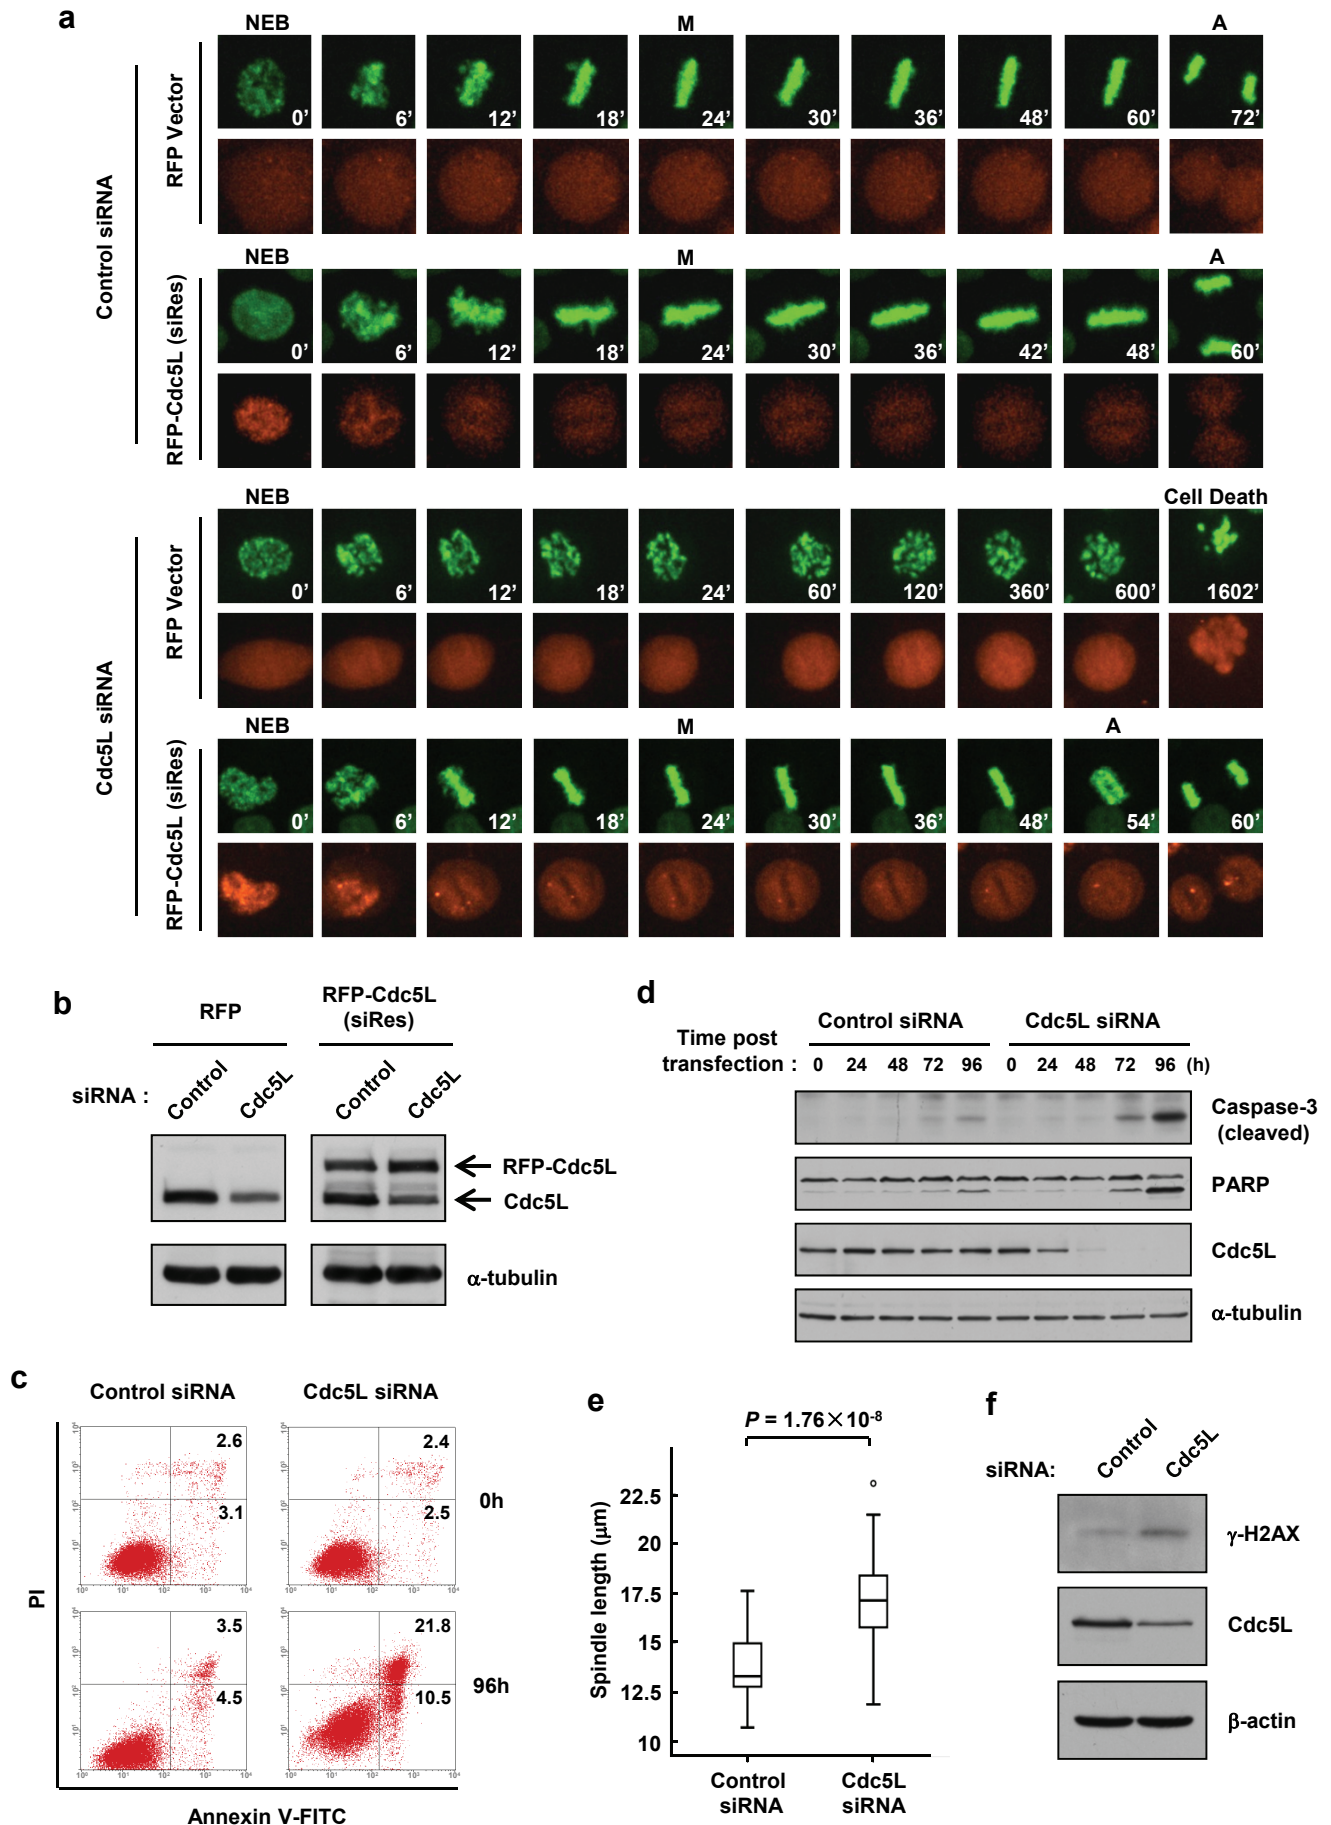

Supplementary Figure S2 Cdc5L knockdown causes mitotic catastrophe and DNA damage.

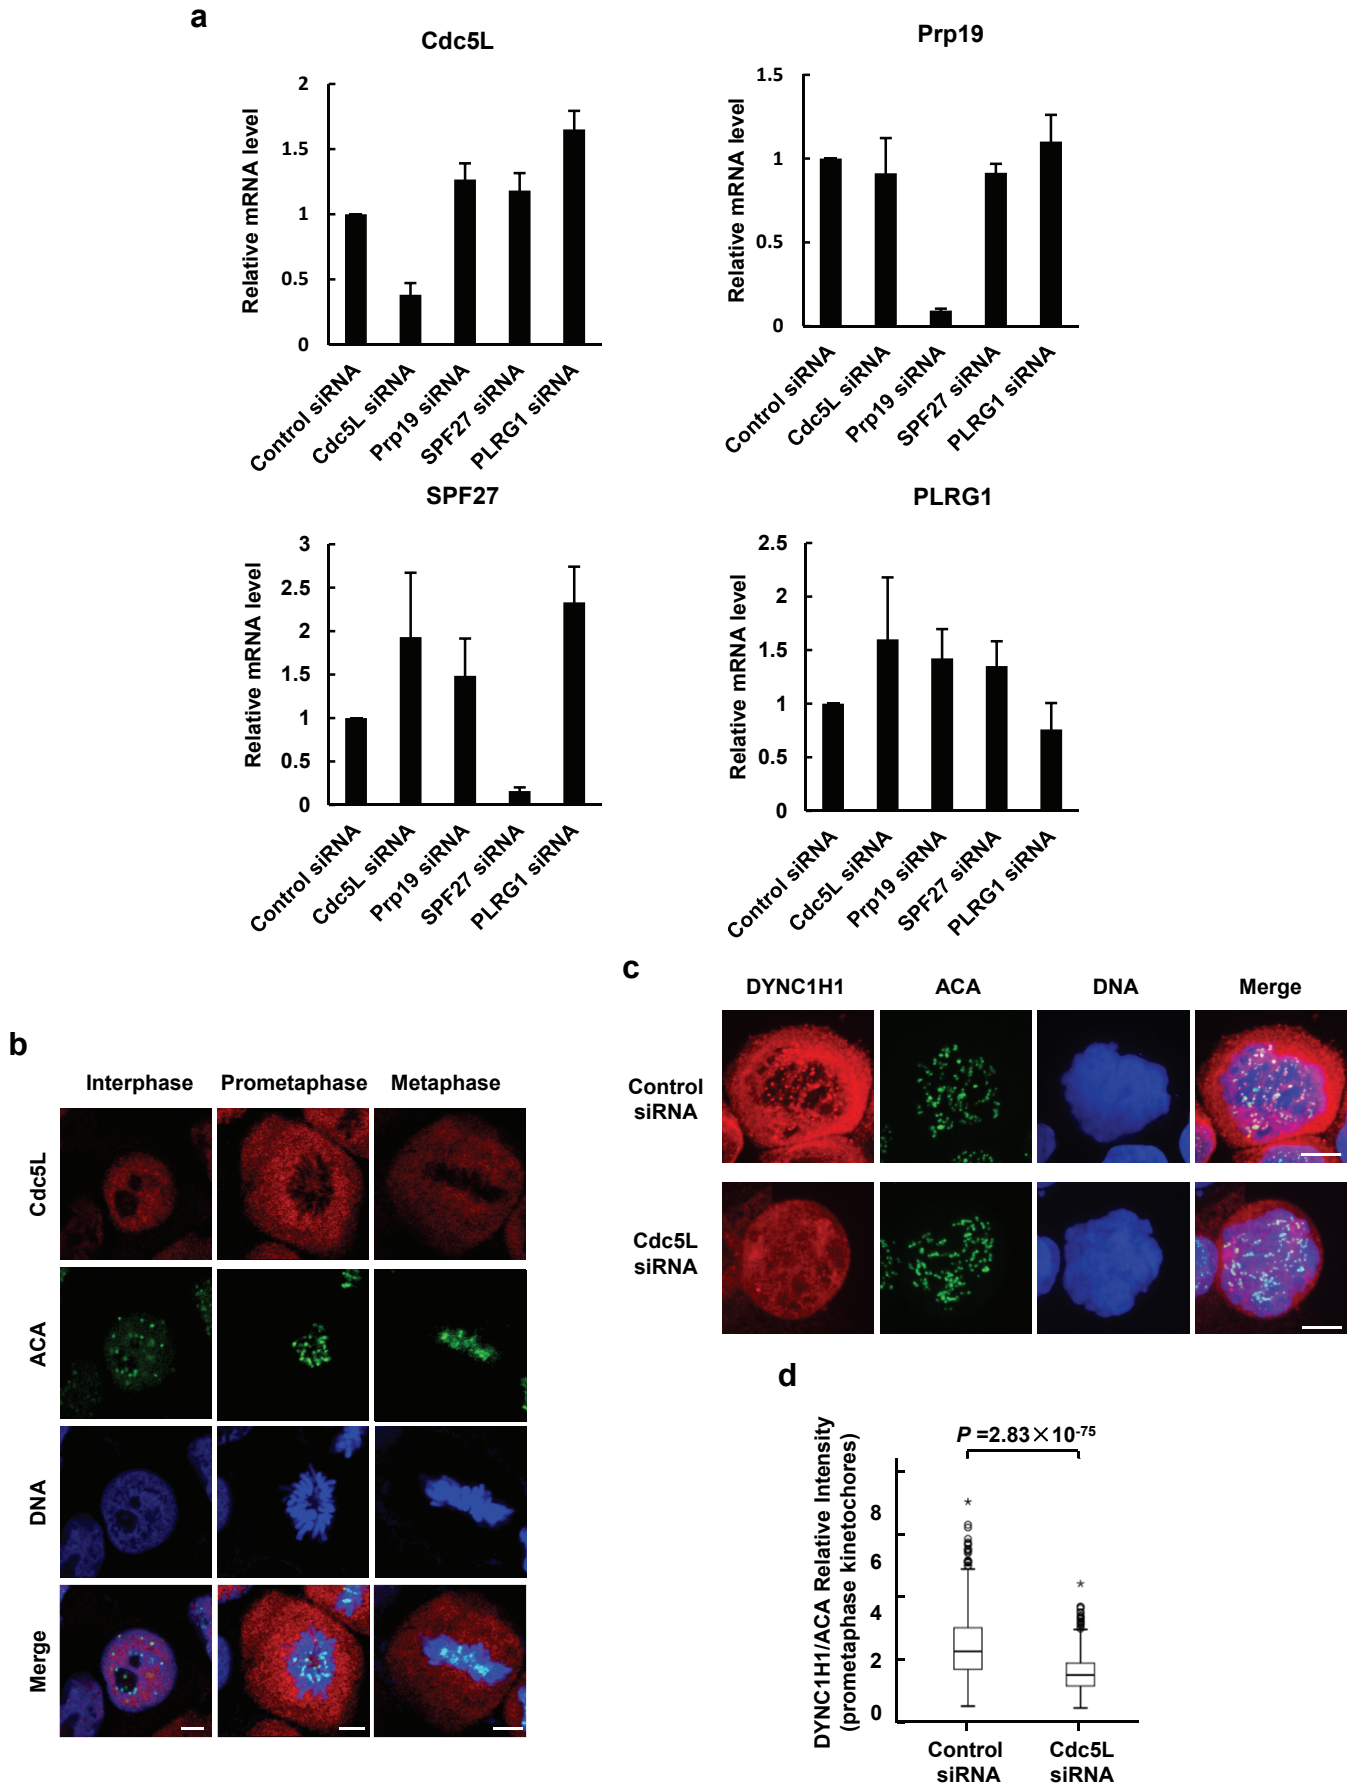

Supplementary Figure S3 Cdc5L regulates the expression of DYNC1H1.

## Supplementary Table 1

Target sequences of siRNAs used in this study

| Gene symbol                 | siRNA no.          | Target sequence (5'-3')   |
|-----------------------------|--------------------|---------------------------|
| Cdc5L                       | no 1 (noHSS190692) | UUGACGUGCAAUUUCACUCGCUUGG |
|                             | no 2 (noHSS101641) | AAUUUGUUAUGCCAGAUUCCUCGGC |
| PLRG1                       | no 1 (noHSS108133) | UCAUAAACAGUACCCUGCCAAUCAA |
|                             | no 2 (noHSS108134) | CCACCGUGGAAACUCUACAGGGUUA |
| SPF27                       | no 1 (noHSS115723) | ACUAAUGUCACAGCAUGGAUGUAAU |
|                             | no 2 (noHSS115724) | UCUAGUUCAUAUGAUUGAACACGCA |
| Prp19                       | no 1 (noHSS120652) | GCAUCGCCUUCUCUGAGAAUGGUUA |
|                             | no 2 (noHSS120653) | GGAUCUGCGCAAGCUUAAGAACUU  |
| Photinus pyralis luciferase |                    | GGAAUUCGAGUCGUCUUAUGUAUA  |

## Supplementary Table 2

Target sequences of primers used for quantitative real-time PCR (qRT-PCR) in this study

| Gene name | Primer name               | Target sequence(5'-3')        |
|-----------|---------------------------|-------------------------------|
| BARD1     | Forward                   | GACAACTGGACAGCATGATTCAAC      |
|           | Reverse                   | TTCTTACTTCGAGGGCTAAACCAC      |
| MYB       | Forward                   | TCCCAAGTCTGAAAGCGTC           |
|           | Reverse                   | CATTCTGTTCACCAGCTTCTTC        |
| DYNC1H1   | Forward                   | GACGTCGGTGATGAAGGAGAAG        |
|           | Reverse                   | TCTGCATCAATCACGGGAGTAC        |
| DCTN4     | Forward                   | TTACCTGGCATGTGGATTTTGTCT      |
|           | Reverse                   | GTGTGTGAGGATTTTCAGGTTCC       |
| DYNLRB2   | Forward                   | AAGCCAAAAGCACAGTTCGTG         |
|           | Reverse                   | TGGCCATCGCAGGTCTATTC          |
| RAD1      | Forward                   | GGGGCTCCGTGAAGCATTTT          |
|           | Reverse                   | GGGATAGTCAAGGTGGGAAC          |
| DCTN1     | Forward                   | CTCTGGTCTCTGGCATTGCTG         |
|           | Reverse                   | AAGCAGCAGTGGTGAGTCCTTC        |
| Cdc5L     | Forward                   | AAGGCCCAGGATGTTTTGGTG         |
|           | Reverse                   | CCTGGTTATAAGCTTCACTTGAGA      |
| Prp19     | Forward                   | GGCACGGATGTCCAGATCTAC         |
|           | Reverse                   | CACGCCAAGTTCATCGCTTC          |
| PLRG1     | Forward                   | CCATTAAGTATACAGAGAGGATGACACAG |
|           | Reverse                   | CTGGAAACCAGAAATTATCAAGAGAAAG  |
| SPF27     | Forward                   | GCAGAGAAAAGAACATGCAACTCAC     |
|           | Reverse                   | CTATCAAATTAAGCAGCAACATGGAG    |
| GAPDH     | Forward                   | CCCCTCCTCCACCTTTGAC           |
|           | Reverse                   | CCAAATTCGTTGTCATACCAGG        |
| DYNC1H1   | spliced-Exon1-Forward     | GATGCGCAAGTTCCTTTG            |
|           | spliced-Exon2-Reverse     | TTCTCCTTCATCACCGACGTC         |
|           | unspliced-Intron1-Forward | GTGCCAAGTCATGTAGGTGTCG        |
| DCTN4     | spliced-Exon2-Forward     | AATATGCCATCGGCTGAAGC          |
|           | spliced-Exon3-Reverse     | GGAAGCTGTGTGGAGATGCTC         |
|           | unspliced-Intron2-Forward | TGGTTGTGTTTGCATGTCACAG        |
| DYNLRB2   | spliced-Exon3-Forward     | AAGCCAAAAGCACAGTTCGTG         |
|           | spliced-Exon4-Reverse     | TGGCCATCGCAGGTCTATTC          |
|           | unspliced-Intron3-Forward | GGTGAATTGATTTTATCCATCTCTCC    |
| RAD1      | spliced-Exon4-Forward     | GGGGCTCCGTGAAGCATTTT          |
|           | spliced-Exon5-Reverse     | GGGATAGTCAAGGTGGGAAC          |
|           | spliced-Exon4-Forward     | GGGGCTCCGTGAAGCATTTT          |
|           | unspliced-Intron4-Reverse | GGGAAGATGGAGTACAGACCAC        |
